# Supplementary material for: The Emergence of Carbapenem- and Colistin-Resistant Enterobacteria in Senegal
Source: MDPI journal article supplement (doi:10.3390/pathogens12080974), 2023-07-26
Supplement: s1 [file s1]

# The Emergence of Carbapenem- and Colistin-Resistant Enterobacteria in Senegal

Habibou Sarr <sup>1,2,3,4</sup>, Aissatou Ahmet Niang <sup>5</sup>, Amadou Diop <sup>5</sup>, Oleg Mediannikov <sup>3,4</sup>, Hanane Zerrouki <sup>3,4</sup>, Seydina M. Diene <sup>3,4</sup>, Seynabou Lo <sup>6</sup>, Mouhamadou Lamine Dia <sup>5</sup>, Ahmad Iyane Sow <sup>5</sup>, Florence Fenollar <sup>4,7</sup>, Jean-Marc Rolain <sup>3,4</sup> and Linda Hadjadj <sup>3,4,\*</sup>

**Citation:** Sarr, H.; Niang, A.A.; Diop, A.; Mediannikov, O.; Zerrouki, H.; Diene, S.M.; Lo, S.; Dia, M.L.; Sow, A.I.; Fenollar, F.; et al. The Emergence of Carbapenem- and Colistin-Resistant Enterobacteria in Senegal.

*Pathogens* **2023**, *12*, 974. <https://doi.org/10.3390/pathogens12080974>

Academic Editors: Carla Calia and Lawrence S. Young

Received: 24 May 2023

Revised: 19 July 2023

Accepted: 24 July 2023

Published: 26 July 2023

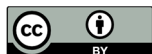

**Copyright:** © 2023 by the authors. Submitted for possible open access publication under the terms and conditions of the Creative Commons Attribution (CC BY) license (<https://creativecommons.org/licenses/by/4.0/>).

<sup>1</sup> UFR des Sciences de la Santé, Université Assane Seck de Ziguinchor, Ziguinchor BP 523, Senegal; habibousarr10@gmail.com

<sup>2</sup> Unité de Bactériologie, Hôpital de la Paix de Ziguinchor, Ziguinchor BP 523, Senegal

<sup>3</sup> Faculté de Médecine et de Pharmacie, MEPHI IRD, APHM, Aix Marseille Université, 13005 Marseille, France; olegusss1@gmail.com (O.M.); zerrouki\_hanane@hotmail.com (H.Z.); seyedina.m.ddiene@gmail.com (S.M.D.); jean-marc.rolain@univ-amu.fr (J.-M.R.)

<sup>4</sup> IHU Méditerranée Infection, 13005 Marseille, France; florence.fenollar@univ-amu.fr

<sup>5</sup> Faculté de Médecine, Pharmacie et Odonto-Stomatologie, Université Cheikh-Anta-Diop, Dakar BP 5005, Senegal; niangaisatou@yahoo.fr (A.A.N.); amadoudioplaba@yahoo.fr (A.D.); lamedia2004@gmail.com (M.L.D.); profisow3@gmail.com (A.I.S.)

<sup>6</sup> UFR des Sciences de la Santé, Université Gaston Berger, Saint Louis BP 234, Senegal; zeynaby78@hotmail.fr

<sup>7</sup> VITROME, IRD, APHM, SSA, Aix Marseille Université, 13005 Marseille, France

\* Correspondence: linda.hadjadj@univ-amu.fr; Tel.: +33-4-86-13-68-30

## Supplementary Material

**Table S1.** Distribution of strains isolated, and antibiotic resistance genes detected by year.

|                   |                               | Years         |               |               |               |
|-------------------|-------------------------------|---------------|---------------|---------------|---------------|
|                   |                               | 2019          | 2020          | 2021          | 2022          |
| Bacterial Species | <i>E. coli</i> (n = 146)      | 51<br>(34.9%) | 47<br>(32.2%) | 36<br>(24.7%) | 12<br>(8.2%)  |
|                   | <i>K. pneumoniae</i> (n = 52) | 0<br>(0%)     | 5<br>(96%)    | 24<br>(46.2%) | 23<br>(44.2%) |
|                   | <i>E. cloacae</i> (n = 33)    | 6<br>(18.2%)  | 10<br>(30.3%) | 10<br>(30.3%) | 7<br>(21.2%)  |
|                   | <i>C. freundii</i> (n = 5)    | 0<br>(0%)     | 1<br>(20%)    | 2<br>(40%)    | 2<br>(40%)    |
|                   | <i>K. aerogenes</i> (n = 1)   | 0<br>(0%)     | 0<br>(0%)     | 1<br>(100%)   | 0<br>(0%)     |
|                   | <i>P. mirabilis</i> (n = 1)   | 0<br>(0%)     | 0<br>(0%)     | 0<br>(0%)     | 1<br>(100%)   |
|                   | <i>S. marcescens</i> (n = 2)  | 1<br>(50%)    | 1<br>(50%)    | 0<br>(0%)     | 0<br>(0%)     |
|                   | <i>bla</i> <sub>CTX-A</sub>   | 48<br>(23.9%) | 47<br>(23.4%) | 64<br>(31.8%) | 42<br>(20.9%) |
|                   | <i>bla</i> <sub>CTX-B</sub>   | 0<br>(0%)     | 1<br>(100%)   | 0<br>(0%)     | 0<br>(0%)     |
|                   | <i>bla</i> <sub>SHV</sub>     | 4<br>(4.4%)   | 16<br>(17.8%) | 38<br>(42.2%) | 32<br>(35.6%) |
| Genes             | <i>bla</i> <sub>TEM</sub>     | 38<br>(22.5%) | 46<br>(27.2%) | 52<br>(30.8%) | 33<br>(19.5%) |
|                   | <i>bla</i> <sub>OXA-48</sub>  | 2*<br>(14.3%) | 2*<br>(14.3%) | 6*<br>(42.9%) | 4*<br>(28.6%) |
|                   | <i>bla</i> <sub>NDM</sub>     | 3*<br>(23.1%) | 0<br>(0%)     | 6*<br>(46.2%) | 4*<br>(30.8%) |
|                   | <i>mcr-8</i>                  | 0<br>(0%)     | 1<br>(100%)   | 0<br>(0%)     | 0<br>(0%)     |
| Hospitals         | Ziguinchor                    | 0<br>(0%)     | 19<br>(22.1%) | 47<br>(54.7%) | 20<br>(23.3%) |
|                   | Dakar                         | 58<br>(37.7%) | 45<br>(29.2%) | 26<br>(16.9%) | 25<br>(16.2%) |

\* Strains with a positive  $\beta$ -CARBA test.**Table S2.** Distribution of antibiotic resistance by bacterial species.

| Antibiotics | Bacterial Species        |                               |                            |                            |                             |                             |                              |
|-------------|--------------------------|-------------------------------|----------------------------|----------------------------|-----------------------------|-----------------------------|------------------------------|
|             | <i>E. coli</i> (n = 146) | <i>K. pneumoniae</i> (n = 52) | <i>E. cloacae</i> (n = 33) | <i>C. freundii</i> (n = 5) | <i>K. aerogenes</i> (n = 1) | <i>P. mirabilis</i> (n = 1) | <i>S. marcescens</i> (n = 2) |
| AMX         | 146                      | 52                            | 33                         | 5                          | 1                           | 1                           | 2                            |
|             | (100%)                   | (100%)                        | (100%)                     | (100%)                     | (100%)                      | (100%)                      | (100%)                       |
| AMC         | 139                      | 49                            | 33                         | 5                          | 1                           | 1                           | 2                            |
|             | (95.2%)                  | (94.2%)                       | (100%)                     | (100%)                     | (100%)                      | (100%)                      | (100%)                       |
| FEP         | 110                      | 50                            | 25                         | 4                          | 0                           | 0                           | 1                            |
|             | (75.3%)                  | (96.2%)                       | (75.8%)                    | (80%)                      | (0%)                        | (0%)                        | (50%)                        |
| TPZ         | 106                      | 47                            | 22                         | 4                          | 1                           | 1                           | 0                            |
|             | (72.6%)                  | (90.4%)                       | (66.7%)                    | (80%)                      | (100%)                      | (100%)                      | (0%)                         |
| MEC         | 21                       | 13                            | 6                          | 1                          | 0                           | 1                           | 2                            |
|             | (14.4%)                  | (25%)                         | (18.2%)                    | (20%)                      | (0%)                        | (100%)                      | (100%)                       |
| CRO         | 119                      | 51                            | 29                         | 4                          | 0                           | 1                           | 2                            |
|             | (81.5%)                  | (98.1%)                       | (87.9%)                    | (80%)                      | (0%)                        | (100%)                      | (100%)                       |
|             | * 5 (1–4)                | * 7 (0.75–6)                  | * 8 (0.74–24)              | * 2 (2–12)                 | 0                           | 0                           | 0                            |

|            |                   |                    |                      |                   |           |                   |                  |
|------------|-------------------|--------------------|----------------------|-------------------|-----------|-------------------|------------------|
| <b>ETP</b> | (3.4%)<br>* 1 (4) | (13.5%)<br>* 2 (4) | (24.2%)<br>* 2 (4–6) | (40%)<br>* 1 (32) | (0%)<br>0 | (0%)<br>* 1 (3)   | (0%)<br>0        |
| <b>IPM</b> | (0.7%)<br>2       | (3.8%)<br>12       | (6.1%)<br>11         | (20%)<br>0        | (0%)<br>0 | (100%)<br>0       | (0%)<br>0        |
| <b>FF</b>  | (1.4%)<br>7       | (23.1%)<br>5       | (33.3%)<br>4         | (0%)<br>0         | (0%)<br>0 | (0%)<br>0         | (0%)<br>1        |
| <b>FT</b>  | (4.8%)<br>111     | (9.6%)<br>37       | (12.1%)<br>22        | (0%)<br>2         | (0%)<br>0 | (0%)<br>1         | (50%)<br>1       |
| <b>SXT</b> | (76%)<br>21       | (71.2%)<br>6       | (66.7%)<br>2         | (40%)<br>0        | (0%)<br>0 | (100%)<br>0       | (50%)<br>1       |
| <b>AK</b>  | (14.4%)<br>111    | (11.5%)<br>39      | (6.1%)<br>33         | (0%)<br>5         | (0%)<br>0 | (0%)<br>1         | (50%)<br>0       |
| <b>CIP</b> | (76%)<br>118      | (75%)<br>27        | (100%)<br>20         | (100%)<br>2       | (0%)<br>0 | (100%)<br>1       | (0%)<br>1        |
| <b>TET</b> | (80.8%)<br>0      | (51.9%)<br>0       | (60.6%)<br>1 (>64)   | (40%)<br>0        | (0%)<br>0 | (100%)<br>1 (>64) | (50%)<br>2 (>64) |
| <b>CS</b>  | (0%)<br>85        | (0%)<br>42         | (3%)<br>21           | (0%)<br>3         | (0%)<br>0 | (100%)<br>1       | (100%)<br>1      |
| <b>GN</b>  | (58.2%)           | (80.8%)            | (63.6%)              | (60%)             | (0%)      | (100%)            | (50%)            |

AMX = Amoxicillin, AMC = Amoxicillin/Clavulanic Acid, FEP = Cefepime, TPZ = Piperacillin/Tazobactam, MEC = Mecillinam, CRO = Ceftriaxone, ETP = Ertapenem, IPM = Imipenem, FF = Fosfomicin, FT = Furan, SXT = Trimethoprim/Sulfamethoxazole, AK = Amikacin, CIP = Ciprofloxacin, TET = Tetracycline, CS = Colistin, GN = Gentamicin. \* = MIC value in mg/L.
